# Supplementary material for: Relative Telomere Length Is Associated with the Risk of Development and Severity of the Course of Age-Related Macular Degeneration in the Russian Population
Source: MDPI journal article supplement (doi:10.3390/ijms241411360), 2023-07-12
Supplement: s1 [file s1]

**Supplementary Table S1: Sensitivity and specificity analyses for the logistic regression analysis investigating the association of AMD using different adjustment variables.**

| Model                                                                                                                                      | OR (95% CI)                                                                                                                                                                                                                                                                                                | p-value                                                                                                                                                                                       | sensitivity | specificity |
|--------------------------------------------------------------------------------------------------------------------------------------------|------------------------------------------------------------------------------------------------------------------------------------------------------------------------------------------------------------------------------------------------------------------------------------------------------------|-----------------------------------------------------------------------------------------------------------------------------------------------------------------------------------------------|-------------|-------------|
| Model 0<br>Unadjusted                                                                                                                      | <b>1.371 - 1.871</b>                                                                                                                                                                                                                                                                                       | <b>0.045</b>                                                                                                                                                                                  | -           | -           |
| Model 1 adjusted<br>for sex                                                                                                                | <b>1.529 (0.837 - 2.869)</b><br>Sex - 0.864 (0.420 - 1.743)                                                                                                                                                                                                                                                | 0.173<br>Sex - 0.685                                                                                                                                                                          | -           | -           |
| Model 2 adjusted<br>for age and sex                                                                                                        | <b>0.518 (0.063 - 4.188)</b><br>Sex - 0.839 (0.406 - 1.699)<br>Age - 1.016 (0.987 - 1.046)                                                                                                                                                                                                                 | 0.536<br>Sex - 0.628<br>Age - 0.288                                                                                                                                                           | 0.071       | 0.958       |
| Model 3 adjusted<br>for age, sex and<br>current smoking                                                                                    | <b>0.671 (0.072 - 6.281)</b><br>Sex - 0.705 (0.279 - 1.685)<br>Age - 1.015 (0.986 - 1.045)<br>Smoking -0.693 (0.228 - 2.072)                                                                                                                                                                               | 0.725<br>Sex - 0.441<br>Age - 0.326<br>Smoking - 0.510                                                                                                                                        | 0.086       | 0.938       |
| Model 4 adjusted<br>for age, sex, current<br>smoking,<br>cardiovascular<br>disease,<br>hypertension,<br>obesity and<br>physical inactivity | <b>4.868 (0.340 - 73.800)</b><br>Sex - 0.241 (0.078 - 0.685)<br>Age - 0.988 (0.954 - 1.023)<br>Smoking - 0.407 (0.112 - 1.448)<br>Cardiovascular disease - 3.506 (1.506 - 8.644)<br>Hypertension - 0.453 (0.124 - 1.578)<br>Obesity - 3.003 (1.108 - 8.77)<br>Physical inactivity - 6.694 (2.705 - 18.331) | <b>0.246</b><br>Sex - 0.009*<br>Age - 0.507<br>Smoking - 0.166<br>Cardiovascular<br>disease - 0.005 *<br>Hypertension - 0.218<br>Obesity - 0.036 *<br>Physical inactivity -<br><b>0.0001*</b> | 0.757       | 0.666       |
| Model 5 adjusted<br>for sex,<br>cardiovascular<br>disease and<br>physical inactivity                                                       | <b>0.929 (0.467 - 1.854)</b><br>Sex - 0.428 (0.183 - 0.958)<br>Cardiovascular disease - 2.328 (1.131 - 4.889)<br>Physical inactivity - 7.181 (3.123 - 18.310)                                                                                                                                              | 0.833<br>Sex - <b>0.043*</b><br>Cardiovascular<br>disease - <b>0.023*</b><br>Physical inactivity -<br><b>&lt;0,00001 *</b>                                                                    | 0.871       | 0.583       |

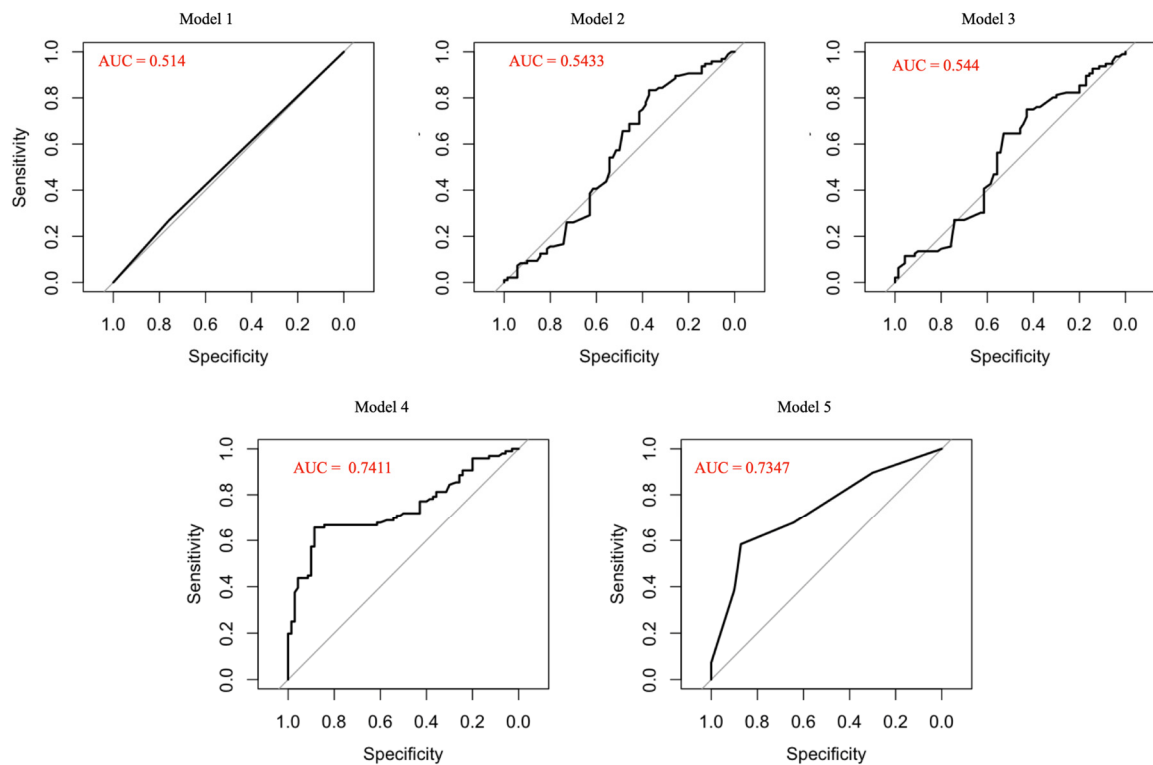

**Supplementary Figure S1.** ROC curves for Logistic Regression Models without RTL data. Model 1 receiver operating characteristic (ROC) curve adjusted for sex. Model 2 ROC curve adjusted for age and sex. Model 3 ROC curve adjusted for age, sex and current smoking. Model 4 ROC curve adjusted for age, sex, current smoking, cardiovascular disease, hypertension, obesity and physical inactivity. Model 5 ROC curve adjusted for sex, cardiovascular disease and physical inactivity. Area under the curve (AUC) values are the probability that a randomly selected 'case' (here, a AMD) is ranked as being at greater risk of being a 'case' than a randomly selected control of the same covariates.

**Supplementary Table S2: Sensitivity and specificity analyses for the logistic regression analysis investigating the association of RTL and AMD using different adjustment variables.**

| RTL                                                                      | All, n = 166 |             | Women, n = 119 |             | Men, n = 47 |             |
|--------------------------------------------------------------------------|--------------|-------------|----------------|-------------|-------------|-------------|
|                                                                          | sensitivity  | specificity | sensitivity    | specificity | sensitivity | specificity |
| Model 1 adjusted for sex                                                 | 0.829        | 0.927       | -              | -           | -           | -           |
| Model 2 adjusted for age and sex                                         | 0.814        | 0.917       | 0.830          | 0.914       | 0.824       | 0.808       |
| Model 3 adjusted for age, sex and current smoking                        | 0.814        | 0.917       | 0.8301887      | 0.914       | 0.765       | 0.885       |
| Model 4 adjusted for sex, cardiovascular disease and physical inactivity | 0.843        | 0.938       | 0.8235294      | 0.923       | 0.882       | 0.923       |
